# Supplementary material
Source: publisher site journal article supplement (https://www.dovepress.com/get_supplementary_file.php?f=453385.docx)
Supplement: Supplementary file 1 [file get_supplementary_file.php]

**Supporting Information**

**Poly(Lysine)-Derived Carbon Quantum Dots Conquer *Enterococcus faecalis* Biofilm-Induced Persistent Endodontic Infections**


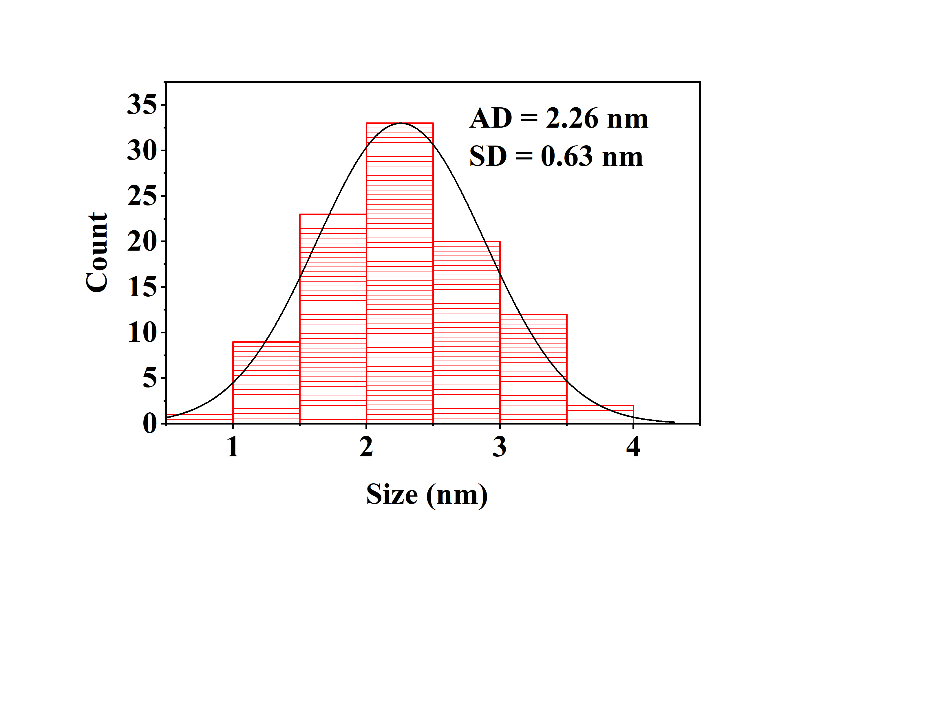


**Figure S1.** Particle size distribution of PL-CQDs.


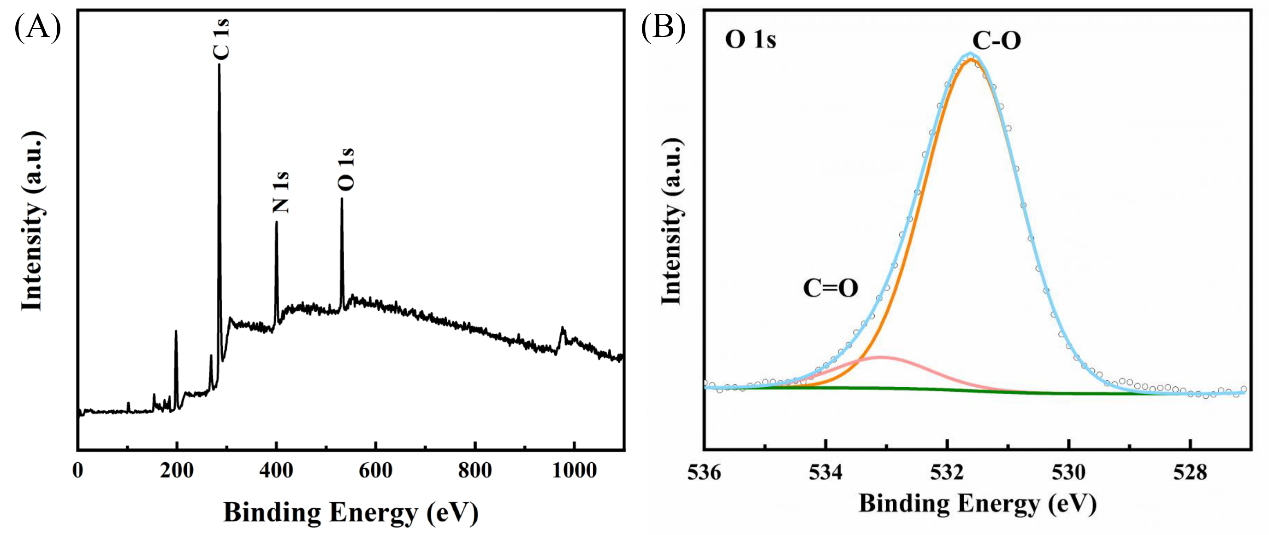


**Figure S2.** (A).XPS full survey of CQD180. (B) XPS O 1s spectra of PL-CQDs.


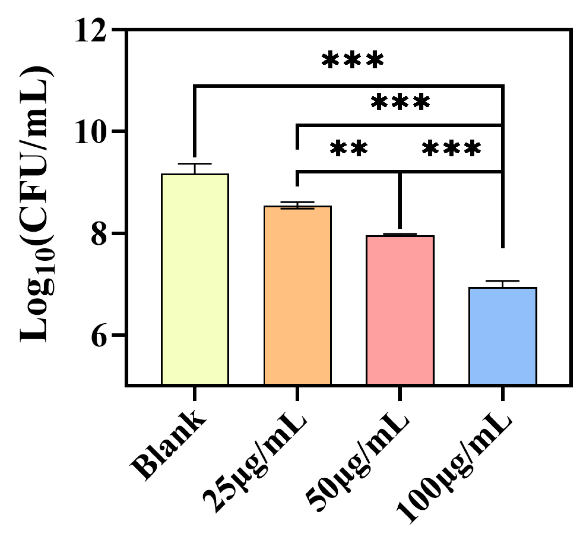


**Figure S3.** Number of colonies of *E. faecalis* after co-culture with PL-CQDs for 1 min. ∗∗*p*< 0.05, ∗∗∗*p*< 0.001.


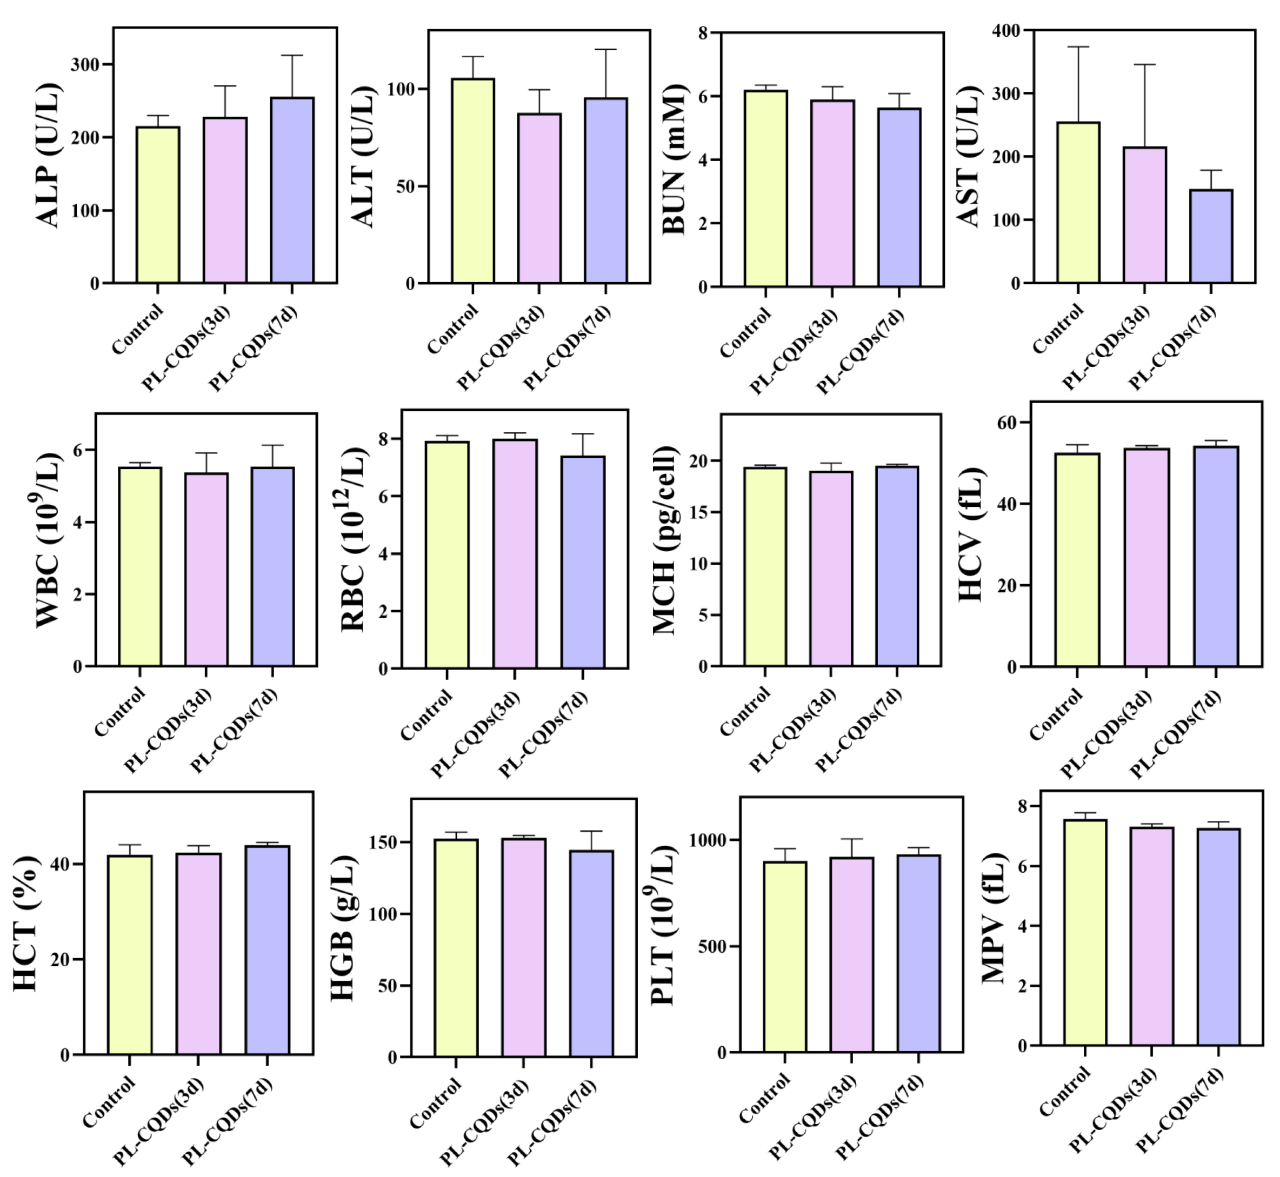


**Figure S4.** Blood biochemical and hematological data of mice after the administration of the PL-CQDs for 3 days and 7 days.
